# Supplementary material
Source: publisher figshare collection journal article supplement (https://sage.figshare.com/ndownloader/files/17360012)
Supplement: Supplementary file 1 [file 17360012]

**Table S6.** Participant's mean scores (and standard deviations) of manifestations of emotional states (OERS) in each phase.

|              | Participant | A1         | B1         | A2         | B2         |
|--------------|-------------|------------|------------|------------|------------|
| Pleasure     | 1           | 3.7 (0.57) | 4.4 (0.22) | 3.2 (0.67) | 4.8 (0.27) |
|              | 2           | 3.4 (0.82) | 5 (0.00)   | 4.1 (0.42) | 4.7 (0.27) |
|              | 3           | 4.3 (0.45) | 4.8 (0.27) | 4.5 (0.35) | 4.8 (0.27) |
| Anger        | 1           | 1 (0.00)   | 1 (0.00)   | 1.1 (0.22) | 1 (0.00)   |
|              | 2           | 1.4 (0.55) | 1 (0.00)   | 1 (0.00)   | 1.4 (0.65) |
|              | 3           | 1 (0.00)   | 1.1 (0.22) | 1.1 (0.22) | 1 (0.00)   |
| Anxiety/Fear | 1           | 1.1 (0.22) | 1.2 (0.27) | 1 (0.00)   | 1 (0.00)   |
|              | 2           | 1.3 (0.67) | 1 (0.00)   | 1.3 (0.67) | 1.4 (0.65) |
|              | 3           | 1.1 (0.22) | 1 (0.00)   | 1 (0.00)   | 1.1 (0.22) |
| Sadness      | 1           | 1.2 (0.27) | 1.3 (0.27) | 1.5 (0.71) | 1.4 (0.42) |
|              | 2           | 2 (0.93)   | 1 (0.00)   | 1.2 (0.45) | 1 (0.00)   |
|              | 3           | 1 (0.00)   | 1 (0.00)   | 1 (0.00)   | 1 (0.00)   |
| Alertness    | 1           | 5 (0.00)   | 5 (0.00)   | 4.9 (0.22) | 5 (0.00)   |
|              | 2           | 5 (0.00)   | 4.9 (0.22) | 5 (0.00)   | 4.9 (0.22) |
|              | 3           | 5 (0.00)   | 5 (0.00)   | 5 (0.00)   | 4.9 (0.22) |

Note: The values represent the means of the two coders' assessments. A higher mean indicates more time expressing that emotional state. A1, A2 = Baseline; B1, B2 = DAT.
