# Supplementary material
Source: publisher figshare collection journal article supplement (https://sage.figshare.com/ndownloader/files/17360012)
Supplement: Supplementary file 2 [file 17360012]

**Table S5.** Mean scores (and standard deviations) of prosocial behaviors (SBOC) in each treatment condition. Results of Mann-Whitney tests and effect sizes.

|                              | A              | B              | <i>U</i> | <i>z</i> | <i>p</i> | <i>r</i> | Participant | A              | B              | <i>U</i> | <i>z</i> | <i>p</i> | <i>r</i> |
|------------------------------|----------------|----------------|----------|----------|----------|----------|-------------|----------------|----------------|----------|----------|----------|----------|
| Overall SBOC                 | 157.48 (16.23) | 200.80 (7.16)  | .00      | -3.780   | .000     | -.85     | 1           | 106.45 (21.48) | 155.10 (18.30) | 2.00     | -3.633   | .000     | -.81     |
|                              |                |                |          |          |          |          | 2           | 223.05 (25.48) | 275.20 (19.35) | 2.00     | -3.630   | .000     | -.81     |
|                              |                |                |          |          |          |          | 3           | 142.95 (15.54) | 172.10 (27.45) | 19.00    | -2.344   | .019     | -.52     |
| Smiles                       | 22.30 (4.80)   | 25.70 (2.81)   | 26.00    | -1.815   | .075     | -.41     | 1           | 11.05 (4.11)   | 15.75 (4.27)   | 21.50    | -2.157   | .029     | -.48     |
|                              |                |                |          |          |          |          | 2           | 25.45 (11.97)  | 35.40 (5.50)   | 24.50    | -1.931   | .052     | -.43     |
|                              |                |                |          |          |          |          | 3           | 30.40 (7.72)   | 25.95 (4.23)   | 27.00    | -1.740   | .089     | -.39     |
| Leans                        | 2.85 (1.47)    | 18.52 (3.57)   | .00      | -3.784   | .000     | -.85     | 1           | 2.00 (1.90)    | 12.30 (5.33)   | .00      | -3.792   | .000     | -.85     |
|                              |                |                |          |          |          |          | 2           | 4.20 (2.15)    | 23.90 (5.60)   | .00      | -3.782   | .000     | -.85     |
|                              |                |                |          |          |          |          | 3           | 2.35 (2.80)    | 19.35 (5.61)   | .00      | -3.782   | .000     | -.85     |
| Looks                        | 49.65 (6.68)   | 59.28 (6.86)   | 16.50    | -2.533   | .009     | -.57     | 1           | 28.05 (7.29)   | 49.70 (7.05)   | 2.00     | -3.628   | .000     | -.81     |
|                              |                |                |          |          |          |          | 2           | 79.15 (13.94)  | 80.55 (12.77)  | 48.50    | -.113    | .912     | -.03     |
|                              |                |                |          |          |          |          | 3           | 41.75 (3.60)   | 47.60 (10.50)  | 33.00    | -1.286   | .218     | -.29     |
| Physical contact             | 1.98 (0.94)    | 18.92 (6.98)   | .00      | -3.780   | .000     | -.85     | 1           | 0.95 (1.26)    | 16.00 (14.61)  | .50      | -3.765   | .000     | -.84     |
|                              |                |                |          |          |          |          | 2           | 3.25 (2.66)    | 24.35 (12.65)  | .00      | -3.787   | .000     | -.85     |
|                              |                |                |          |          |          |          | 3           | 1.756 (1.57)   | 16.40 (5.98)   | .00      | -3.803   | .000     | -.85     |
| Verbalizations               | 80.70 (7.14)   | 78.38 (5.36)   | 44.50    | -.416    | .684     | -.09     | 1           | 64.4 (13.66)   | 61.35 (9.67)   | 41.00    | -.680    | .529     | -.15     |
|                              |                |                |          |          |          |          | 2           | 111.00 (0.00)  | 111.00 (0.00)  | 50.00    | .000     | 1.000    | .00      |
|                              |                |                |          |          |          |          | 3           | 66.70 (11.50)  | 62.80 (9.80)   | 43.00    | -.530    | .631     | -.12     |
| Verbalizations (transcribed) | 103.50 (12.84) | 119.60 (12.16) | 19.00    | -2.343   | .019     | -.52     | 1           | 80.50 (18.09)  | 87.60 (10.77)  | 41.50    | -.643    | .529     | -.14     |
|                              |                |                |          |          |          |          | 2           | 122.30 (23.21) | 149.00 (26.51) | 21.50    | -1.853   | .029     | -.41     |
|                              |                |                |          |          |          |          | 3           | 107.70 (19.56) | 122.20 (13.60) | 25.50    | -2.158   | .063     | -.48     |

Note: The values are the mean of the social behaviors coded by two coders in each phase. A higher mean reflects a higher frequency of the behavior.

A = Baseline; B = DAT.
