# Supplementary material
Source: publisher figshare collection journal article supplement (https://sage.figshare.com/ndownloader/files/17360012)
Supplement: Supplementary file 3 [file 17360012]

**Table S2.** Shapiro-Wilk tests result for ANOVA residuals of Total SBOC.

|                  | Treatment | <i>W</i> | <i>df</i> | <i>p</i> |
|------------------|-----------|----------|-----------|----------|
| Residual S1_SBOC | A         | .888     | 10        | .162     |
|                  | B         | .923     | 10        | .383     |
| Residual S2_SBOC | A         | .962     | 10        | .807     |
|                  | B         | .845     | 10        | .050     |
| Residual S3_SBOC | A         | .923     | 10        | .385     |
|                  | B         | .963     | 10        | .814     |

**Table S3.** Shapiro-Wilk tests result for MANOVA residuals of SBOC.

|                              | Treatment | <i>W</i> | <i>df</i> | <i>p</i> |
|------------------------------|-----------|----------|-----------|----------|
| Residual S1_SMILE            | A         | .932     | 10        | .467     |
|                              | B         | .937     | 10        | .517     |
| Residual S2_SMILE            | A         | .985     | 10        | .985     |
|                              | B         | .924     | 10        | .391     |
| Residual S3_SMILE            | A         | .957     | 10        | .749     |
|                              | B         | .959     | 10        | .779     |
| Residual S1_LEANS            | A         | .871     | 10        | .104     |
|                              | B         | .893     | 10        | .185     |
| Residual S2_LEANS            | A         | .965     | 10        | .837     |
|                              | B         | .926     | 10        | .407     |
| Residual S3_LEANS            | A         | .805     | 10        | .017     |
|                              | B         | .969     | 10        | .883     |
| Residual S1_LOOKS            | A         | .960     | 10        | .788     |
|                              | B         | .953     | 10        | .704     |
| Residual S2_LOOKS            | A         | .920     | 10        | .355     |
|                              | B         | .881     | 10        | .136     |
| Residual S3_LOOKS            | A         | .962     | 10        | .813     |
|                              | B         | .980     | 10        | .965     |
| Residual S1_PHYSICAL CONTACT | A         | .770     | 10        | .006     |
|                              | B         | .697     | 10        | .001     |
| Residual S2_PHYSICAL CONTACT | A         | .890     | 10        | .168     |
|                              | B         | .693     | 10        | .001     |
| Residual S3_PHYSICAL CONTACT | A         | .809     | 10        | .019     |
|                              | B         | .895     | 10        | .191     |
| Residual S1_VERBALIZATIONS   | A         | .938     | 10        | .532     |
|                              | B         | .889     | 10        | .164     |
| Residual S2_VERBALIZATIONS   | A         | -        | -         | -        |
|                              | B         | -        | -         | -        |
| Residual S3_VERBALIZATIONS   | A         | .939     | 10        | .540     |
|                              | B         | .939     | 10        | .538     |

**Table S4.** Shapiro-Wilk tests result for ANOVA residuals of transcribed verbalizations.

|                            | Treatment | <i>W</i> | <i>df</i> | <i>p</i> |
|----------------------------|-----------|----------|-----------|----------|
| Residual S1_VERBALIZATIONS | A         | .954     | 10        | .718     |
| TRANSCRIBED                | B         | .957     | 10        | .753     |
| Residual S2_VERBALIZATIONS | A         | .887     | 10        | .158     |
| TRANSCRIBED                | B         | .948     | 10        | .643     |
| Residual S3_VERBALIZATIONS | A         | .928     | 10        | .432     |
| TRANSCRIBED                | B         | .944     | 10        | .604     |
