# Supplementary material
Source: publisher figshare collection journal article supplement (https://sage.figshare.com/ndownloader/files/17360012)
Supplement: Supplementary file 4 [file 17360012]

**Table S8.** Mean scores (and standard deviations) of emotional manifestations (OERS) in each treatment condition.

Results of Mann-Whitney tests and effect sizes.

|              | A           | B           | <i>U</i> | <i>z</i> | <i>p</i> | <i>r</i> | Participant | A           | B           | <i>U</i> | <i>z</i> | <i>p</i> | <i>r</i> |
|--------------|-------------|-------------|----------|----------|----------|----------|-------------|-------------|-------------|----------|----------|----------|----------|
| Pleasure     | 3.87 (0.27) | 4.75 (0.12) | .000     | -3.850   | .000     | -.86     | 1           | 3.45 (0.64) | 4.60 (0.32) | 4.500    | -3.571   | .000     | -.80     |
|              |             |             |          |          |          |          | 2           | 3.75 (0.72) | 4.85 (0.24) | 3.000    | -3.680   | .000     | -.82     |
|              |             |             |          |          |          |          | 3           | 4.40 (0.39) | 4.80 (0.26) | 22.000   | -2.274   | .035     | -.51     |
| Anger        | 1.10 (0.16) | 1.08 (0.16) | 48.500   | -.140    | .912     | -.03     | 1           | 1.05 (0.16) | 1.00 (0.00) | 45.000   | -1.000   | .739     | -.22     |
|              |             |             |          |          |          |          | 2           | 1.20 (0.42) | 1.20 (0.48) | 50.000   | .000     | 1.000    | .00      |
|              |             |             |          |          |          |          | 3           | 1.05 (0.16) | 1.05 (0.16) | 50.000   | .000     | 1.000    | .00      |
| Anxiety/Fear | 1.13 (0.29) | 1.12 (0.18) | 43.500   | -.606    | .631     | -.14     | 1           | 1.05 (0.16) | 1.10 (0.21) | 45.000   | -0.610   | .739     | -.14     |
|              |             |             |          |          |          |          | 2           | 1.30 (0.63) | 1.20 (0.48) | 49.000   | -0.108   | .971     | -.02     |
|              |             |             |          |          |          |          | 3           | 1.05 (0.16) | 1.05 (0.16) | 50.000   | .000     | 1.000    | .00      |
| Sadness      | 1.32 (0.27) | 1.12 (0.11) | 26.000   | -1.884   | .075     | -.42     | 1           | 1.35 (0.53) | 1.35 (0.34) | 44.500   | -0.456   | .684     | -.10     |
|              |             |             |          |          |          |          | 2           | 1.60 (0.81) | 1.00 (0.00) | 25.000   | -2.490   | 0.63     | -.56     |
|              |             |             |          |          |          |          | 3           | 1.00 (0.00) | 1.00 (0.00) | 50.000   | .000     | 1.000    | .00      |
| Alertness    | 4.98 (0.05) | 4.95 (0.08) | 40.000   | -1.090   | .481     | -.24     | 1           | 4.95 (0.16) | 5.00 (0.00) | 44.500   | -1.000   | .739     | -.22     |
|              |             |             |          |          |          |          | 2           | 5.00 (0.00) | 4.90 (0.21) | 40.000   | -1.453   | .481     | -.32     |
|              |             |             |          |          |          |          | 3           | 5.00 (0.00) | 4.95 (0.16) | 45.000   | -1.000   | .739     | -.22     |

Note: The values are the mean of the OERS scores coded by two coders in each phase. A higher mean reflects more time

displaying the affective response. A = Baseline; B = DAT.
