# Supplementary material
Source: publisher figshare collection journal article supplement (https://sage.figshare.com/ndownloader/files/17360012)
Supplement: Supplementary file 5 [file 17360012]

**Table S12.** Mean scores (and standard deviations) of NPT-ES in each treatment condition. Results of Mann-Whitney tests and effect sizes.

|                          | A            | B            | <i>U</i> | <i>z</i> | <i>p</i> | <i>r</i> | Participant | A            | B            | <i>U</i> | <i>z</i> | <i>p</i> | <i>r</i> |
|--------------------------|--------------|--------------|----------|----------|----------|----------|-------------|--------------|--------------|----------|----------|----------|----------|
| Total NPT-ES             | 11.83 (0.98) | 14.29 (0.30) | .000     | -3.784   | .000     | -.85     | 1           | 12.78 (1.15) | 14.30 (0.50) | 6.00     | -3.351   | .000     | -.75     |
|                          |              |              |          |          |          |          | 2           | 9.83 (1.86)  | 14.02 (0.71) | .50      | -3.753   | .000     | -.84     |
|                          |              |              |          |          |          |          | 3           | 12.88 (1.32) | 14.55 (0.42) | 7.50     | -3.237   | .000     | -.72     |
| Participation            | 2.43 (0.21)  | 2.80 (0.09)  | 3.500    | -3.564   | .000     | -.80     | 1           | 2.93 (0.24)  | 3.00 (0.00)  | 45.00    | -1.000   | .739     | -.22     |
|                          |              |              |          |          |          |          | 2           | 1.63 (0.38)  | 2.45 (0.23)  | 2.00     | -3.702   | .000     | -.83     |
|                          |              |              |          |          |          |          | 3           | 2.75 (0.26)  | 2.95 (0.11)  | 27.00    | -1.982   | .089     | -.44     |
| Pleasure                 | 1.73 (0.28)  | 2.75 (0.10)  | .000     | -3.814   | .000     | -.85     | 1           | 1.73 (0.38)  | 2.65 (0.29)  | 2.00     | -3.663   | .000     | -.82     |
|                          |              |              |          |          |          |          | 2           | 1.47 (0.52)  | 2.90 (0.17)  | .00      | -3.872   | .000     | -.87     |
|                          |              |              |          |          |          |          | 3           | 2.00 (0.42)  | 2.70 (0.26)  | 7.50     | -3.265   | .000     | -.73     |
| Relationship with others | 2.78 (0.17)  | 2.95 (0.04)  | 19.000   | -2.432   | .019     | -.54     | 1           | 2.85 (0.21)  | 2.90 (0.13)  | 46.00    | -0.347   | .796     | -.08     |
|                          |              |              |          |          |          |          | 2           | 2.93 (0.12)  | 3.00 (0.00)  | 35.00    | -1.831   | .280     | -.41     |
|                          |              |              |          |          |          |          | 3           | 2.55 (0.35)  | 2.95 (0.11)  | 18.00    | -2.662   | .015     | -.60     |
| Displeasure              | 2.33 (0.30)  | 2.85 (0.10)  | 1.500    | -3.698   | .000     | -.83     | 1           | 2.38 (0.43)  | 2.75 (0.20)  | 21.50    | -2.213   | .029     | -.49     |
|                          |              |              |          |          |          |          | 2           | 1.80 (0.73)  | 2.80 (0.28)  | 6.50     | -3.361   | .000     | -.75     |
|                          |              |              |          |          |          |          | 3           | 2.80 (0.26)  | 3.00 (0.00)  | 30.00    | -2.179   | .143     | -.49     |
| Rejection                | 2.56 (0.20)  | 2.94 (0.10)  | 5.000    | -3.470   | .000     | -.78     | 1           | 2.90 (0.17)  | 3.00 (0.00)  | 35.00    | -1.826   | .280     | -.41     |
|                          |              |              |          |          |          |          | 2           | 2.00 (0.41)  | 2.88 (0.18)  | 2.50     | -3.666   | .000     | -.82     |
|                          |              |              |          |          |          |          | 3           | 2.77 (0.32)  | 2.95 (0.16)  | 31.00    | -1.776   | .165     | -.40     |

Note: The values are the mean of the NPT-ES scores coded by four coders in each phase. A higher mean reflects a better experience during the session. A = Baseline; B = DAT.
