# Supplementary material
Source: publisher figshare collection journal article supplement (https://sage.figshare.com/ndownloader/files/17360012)
Supplement: Supplementary file 6 [file 17360012]

**Table S10.** Shapiro-Wilk tests result for ANOVA residuals of NPT-ES Total.

|                       | Treatment | <i>W</i> | <i>df</i> | <i>p</i> |
|-----------------------|-----------|----------|-----------|----------|
| Residual S1_NPT Total | A         | .898     | 10        | .210     |
|                       | B         | .922     | 10        | .377     |
| Residual S2_NPT Total | A         | .979     | 10        | .957     |
|                       | B         | .906     | 10        | .253     |
| Residual S3_NPT Total | A         | .905     | 10        | .246     |
|                       | B         | .838     | 10        | .041     |

**Table S11.** Shapiro-Wilk tests result for MANOVA residuals of NPT-ES.

|                                      | Treatment | <i>W</i> | <i>df</i> | <i>p</i> |
|--------------------------------------|-----------|----------|-----------|----------|
| Residual S1_PARTICIPATION            | A         | .366     | 10        | .000     |
|                                      | B         | -        | -         | -        |
| Residual S2_PARTICIPATION            | A         | .865     | 10        | .087     |
|                                      | B         | .750     | 10        | .004     |
| Residual S3_PARTICIPATION            | A         | .859     | 10        | .074     |
|                                      | B         | .509     | 10        | .000     |
| Residual S1_PLEASURE                 | A         | .895     | 10        | .193     |
|                                      | B         | .878     | 10        | .124     |
| Residual S2_PLEASURE                 | A         | .956     | 10        | .738     |
|                                      | B         | .650     | 10        | .000     |
| Residual S3_PLEASURE                 | A         | .880     | 10        | .132     |
|                                      | B         | .895     | 10        | .191     |
| Residual S1_RELATIONSHIP WITH OTHERS | A         | .717     | 10        | .001     |
|                                      | B         | .640     | 10        | .000     |
| Residual S2_RELATIONSHIP WITH OTHERS | A         | .594     | 10        | .000     |
|                                      | B         | -        | -         | -        |
| Residual S3_RELATIONSHIP WITH OTHERS | A         | .875     | 10        | .115     |
|                                      | B         | .509     | 10        | .000     |
| Residual S1_DISPLEASURE              | A         | .951     | 10        | .683     |
|                                      | B         | .832     | 10        | .035     |
| Residual S2_DISPLEASURE              | A         | .869     | 10        | .096     |
|                                      | B         | .740     | 10        | .003     |
| Residual S3_DISPLEASURE              | A         | .640     | 10        | .000     |
|                                      | B         | -        | -         | -        |
| Residual S1_REJECTION                | A         | .650     | 10        | .000     |
|                                      | B         | -        | -         | -        |
| Residual S2_REJECTION                | A         | .950     | 10        | .666     |
|                                      | B         | .731     | 10        | .002     |
| Residual S3_REJECTION                | A         | .744     | 10        | .003     |
|                                      | B         | .366     | 10        | .000     |
