# Supplementary material
Source: publisher figshare collection journal article supplement (https://sage.figshare.com/ndownloader/files/17360012)
Supplement: Supplementary file 7 [file 17360012]

**Table S7.** Shapiro-Wilk tests result for MANOVA residuals of OERS.

|                          | Treatment | <i>W</i> | <i>df</i> | <i>p</i> |
|--------------------------|-----------|----------|-----------|----------|
| Residual S1_PLEASURE     | A         | .835     | 10        | .038     |
|                          | B         | .794     | 10        | .012     |
| Residual S2_PLEASURE     | A         | .807     | 10        | .018     |
|                          | B         | .594     | 10        | .000     |
| Residual S3_PLEASURE     | A         | .820     | 10        | .025     |
|                          | B         | .640     | 10        | .000     |
| Residual S1_ANGER        | A         | .366     | 10        | .000     |
|                          | B         | -        | -         | -        |
| Residual S2_ANGER        | A         | .509     | 10        | .000     |
|                          | B         | .500     | 10        | .000     |
| Residual S3_ANGER        | A         | .366     | 10        | .000     |
|                          | B         | .366     | 10        | .000     |
| Residual S1_ANXIETY/FEAR | A         | .366     | 10        | .000     |
|                          | B         | .509     | 10        | .000     |
| Residual S2_ANXIETY/FEAR | A         | .509     | 10        | .000     |
|                          | B         | .500     | 10        | .000     |
| Residual S3_ANXIETY/FEAR | A         | .366     | 10        | .000     |
|                          | B         | .366     | 10        | .000     |
| Residual S1_SADNESS      | A         | .730     | 10        | .002     |
|                          | B         | .802     | 10        | .015     |
| Residual S2_SADNESS      | A         | .762     | 10        | .005     |
|                          | B         | -        | -         | -        |
| Residual S3_SADNESS      | A         | -        | -         | -        |
|                          | B         | -        | -         | -        |
| Residual S1_ALERTNESS    | A         | .366     | 10        | .000     |
|                          | B         | .509     | 10        | .000     |
| Residual S2_ALERTNESS    | A         | .366     | 10        | .000     |
|                          | B         | .366     | 10        | .000     |
| Residual S3_ALERTNESS    | A         | .509     | 10        | .000     |
|                          | B         | .366     | 10        | .000     |
