# Supplementary material
Source: publisher figshare collection journal article supplement (https://sage.figshare.com/ndownloader/files/17360012)
Supplement: Supplementary file 8 [file 17360012]

**Table S1.** Participant's mean scores (and standard deviation) of prosocial behaviors in each phase (SBOC) and transcribed verbalizations.

|                             | Participant | A1            | B1            | A2             | B2            |
|-----------------------------|-------------|---------------|---------------|----------------|---------------|
| Total SBOC                  | 1           | 111.6 (21.93) | 148.3 (21.57) | 101.3 (22.15)  | 161.9 (13.15) |
|                             | 2           | 218.4 (28.80) | 273 (10.46)   | 227.7 (24.03)  | 277.4 (26.85) |
|                             | 3           | 142.3 (14.33) | 192.8 (19.85) | 143.6 (18.35)  | 151.4 (15.17) |
| Smile                       | 1           | 13.20 (4.15)  | 13.8 (4.41)   | 8.9 (3.05)     | 17.7 (3.47)   |
|                             | 2           | 19.2 (8.88)   | 33.1 (5.92)   | 31.7 (12.09)   | 37.7 (4.44)   |
|                             | 3           | 27.7 (5.92)   | 27.6 (3.47)   | 33.1 (8.99)    | 24.3 (4.62)   |
| Leans                       | 1           | 3.1 (1.88)    | 8.6 (2.63)    | 0.9 (1.24)     | 16 (4.78)     |
|                             | 2           | 4.1 (2.77)    | 23.1 (6.82)   | 4.3 (1.64)     | 24.7 (4.72)   |
|                             | 3           | 3.3 (3.55)    | 20.3 (7.37)   | 1.4 (1.67)     | 18.4 (3.76)   |
| Looks                       | 1           | 29 (5.44)     | 51.2 (7.39)   | 27.1 (9.36)    | 48.2 (7.18)   |
|                             | 2           | 80.4 (16.60)  | 85.8 (11.31)  | 77.9 (12.56)   | 75.3 (13.05)  |
|                             | 3           | 40.1 (4.17)   | 55.9 (6.76)   | 43.4 (2.22)    | 39.3 (5.50)   |
| Physical Contact            | 1           | 1.6 (1.52)    | 9.2 (5.09)    | 0.3 (0.45)     | 22.8 (18.40)  |
|                             | 2           | 3.7 (3.80)    | 20 (5.24)     | 2.8 (0.97)     | 28.7 (16.89)  |
|                             | 3           | 2.4 (1.47)    | 18.9 (5.79)   | 1.1 (1.52)     | 13.9 (5.58)   |
| Verbalizations              | 1           | 64.7 (17.26)  | 65.5 (10.97)  | 64.60 (12.54)  | 57.2 (6.86)   |
|                             | 2           | Constant      | Constant      | Constant       | Constant      |
|                             | 3           | 68.8 (11.37)  | 70.1 (5.30)   | 64.6 (12.54)   | 55.5 (7.40)   |
| Verbalization (Transcribed) | 1           | 81 (25.47)    | 84.6 (9.79)   | 80 (9.35)      | 90.6 (11.95)  |
|                             | 2           | 125.6 (30.23) | 155.2 (27.2)  | 119 (16.48)    | 142.8 (27.30) |
|                             | 3           | 105 (11.96)   | 129.60 (9.34) | 110.40 (26.45) | 114.8 (13.85) |

Note: The values are the mean of the behaviors coded by two coders in each phase and the mean of verbalizations transcribed by the researcher. A higher mean reflects a higher frequency of the behavior. A1, A2 = Baseline; B1, B2 = DAT.
