# Supplementary material
Source: publisher figshare collection journal article supplement (https://sage.figshare.com/ndownloader/files/17360012)
Supplement: Supplementary file 9 [file 17360012]

**Table S9.** Participant's mean scores (and standard deviations) in NPT-ES in each phase.

|                             | Participant | A1           | B1           | A2          | B2           |
|-----------------------------|-------------|--------------|--------------|-------------|--------------|
| Total NPT-ES                | 1           | 13.25 (0.61) | 13.95 (0.33) | 12.3 (1.43) | 14.65 (0.38) |
|                             | 2           | 8.95 (1.61)  | 14.35 (0.22) | 10.7 (1.80) | 13.7 (0.91)  |
|                             | 3           | 12.75 (1.07) | 14.85 (0.22) | 13 (1.65)   | 14.25 (0.35) |
| Participation               | 1           | 3.00 (0.00)  | 3.00 (0.00)  | 2.85 (0.34) | 3.00 (0.00)  |
|                             | 2           | 1.55 (0.33)  | 2.45 (0.11)  | 1.70 (0.45) | 2.45 (0.33)  |
|                             | 3           | 2.85 (0.22)  | 2.95 (0.11)  | 2.65 (0.29) | 2.95 (0.11)  |
| Pleasure                    | 1           | 1.85 (0.34)  | 2.45 (0.21)  | 1.60 (0.42) | 2.85 (0.22)  |
|                             | 2           | 1.25 (0.50)  | 3.00 (0.00)  | 1.70 (0.48) | 2.80 (0.21)  |
|                             | 3           | 1.85 (0.38)  | 2.90 (0.14)  | 2.15 (0.45) | 2.50 (0.18)  |
| Relationship<br>with others | 1           | 2.95 (0.11)  | 2.80 (0.11)  | 2.75 (0.25) | 3.00 (0.00)  |
|                             | 2           | 2.85 (0.14)  | 3.00 (0.00)  | 3.00 (0.00) | 3.00 (0.00)  |
|                             | 3           | 2.45 (0.11)  | 3.00 (0.00)  | 2.65 (0.28) | 2.90 (0.00)  |
| Displeasure                 | 1           | 2.55 (0.33)  | 2.70 (0.21)  | 2.20 (0.48) | 2.80 (0.21)  |
|                             | 2           | 1.50 (0.64)  | 2.95 (0.11)  | 2.10 (0.76) | 2.65 (0.34)  |
|                             | 3           | 2.80 (0.27)  | 3.00 (0.00)  | 2.80 (0.27) | 3.00 (0.00)  |
| Rejection                   | 1           | 2.90 (0.14)  | 3.00 (0.00)  | 2.90 (0.22) | 3.00 (0.00)  |
|                             | 2           | 1.80 (0.37)  | 2.95 (0.11)  | 2.20 (0.37) | 2.80 (0.21)  |
|                             | 3           | 2.80 (0.21)  | 3.00 (0.00)  | 2.75 (0.43) | 2.90 (0.22)  |

Note: The values represent the means of the four coders' assessments. A higher mean indicates a more positive experience during the NPT. A1, A2 = Baseline; B1, B2 = DAT.
